# Supplementary material
Source: ML conference proceedings conference paper supplement (https://proceedings.mlr.press/v139/nichol21a.html)
Supplement: Supplementary file 2 [file nichol21a-supp.pdf]

---

# Improved Denoising Diffusion Probabilistic Models (Supplementary)

---

Anonymous Authors<sup>1</sup>

## 1. Hyperparameters

For all of our experiments, we use a UNet model architecture<sup>1</sup> similar to that used by Ho et al. (2020). We changed the attention layers to use multi-head attention (Vaswani et al., 2017), and opted to use four attention heads rather than one (while keeping the same total number of channels). We employ attention not only at the 16x16 resolution, but also at the 8x8 resolution. Additionally, we changed the way the model conditions on  $t$ . In particular, instead of computing a conditioning vector  $v$  and injecting it into hidden state  $h$  as  $\text{GroupNorm}(h + v)$ , we compute conditioning vectors  $w$  and  $b$  and inject them into the hidden state as  $\text{GroupNorm}(h)(w + 1) + b$ . We found in preliminary experiments on ImageNet  $64 \times 64$  that these modifications slightly improved FID.

For ImageNet  $64 \times 64$  the architecture we use is described as follows. The downsampling stack performs four steps of downsampling, each with three residual blocks (He et al., 2015). The upsampling stack is setup as a mirror image of the downsampling stack. From highest to lowest resolution, the UNet stages use  $[C, 2C, 3C, 4C]$  channels, respectively. In our ImageNet  $64 \times 64$  ablations, we set  $C = 128$ , but we experiment with scaling  $C$  in a later section. We estimate that, with  $C = 128$ , our model is comprised of 120M parameters and requires roughly 39 billion FLOPs in the forward pass.

For our CIFAR-10 experiments, we use a smaller model with three resblocks per downsampling stage and layer widths  $[C, 2C, 2C, 2C]$  with  $C = 128$ . We swept over dropout values  $\{0.1, 0.2, 0.3\}$  and found that 0.1 worked best for the linear schedule while 0.3 worked best for our cosine schedule. We expand upon this in Section 6.

We use Adam (Kingma & Ba, 2014) for all of our experiments. For most experiments, we use a batch size of 128,

---

<sup>1</sup>Anonymous Institution, Anonymous City, Anonymous Region, Anonymous Country. Correspondence to: Anonymous Author <anon.email@domain.com>.

Preliminary work. Under review by the International Conference on Machine Learning (ICML). Do not distribute.

<sup>1</sup>In initial experiments, we found that a ResNet-style architecture with no downsampling achieved better log-likelihoods but worse FIDs than the UNet architecture.

| $\lambda$ | Stop-gradient | NLL  | FID   |
|-----------|---------------|------|-------|
| 0.001     | yes           | 3.62 | 28.04 |
| 0.01      | yes           | 3.62 | 27.36 |
| 0.001     | no            | 3.62 | 30.89 |
| 0.01      | no            | 3.63 | 34.35 |

Table 1. Ablating hyper-parameters of the  $L_{\text{hybrid}}$  objective on ImageNet  $64 \times 64$ . All models were trained for 200K iterations.

a learning rate of  $10^{-4}$ , and an exponential moving average (EMA) over model parameters with a rate of 0.9999. For our scaling experiments, we vary the learning rate to accommodate for different model sizes. For our larger class-conditional ImageNet  $64 \times 64$  experiments, we scaled up the batch size to 2048 for faster training on more GPUs.

When using the linear noise schedule from Ho et al. (2020), we linearly interpolate from  $\beta_1 = 0.0001/4$  to  $\beta_{4000} = 0.02/4$  to preserve the shape of  $\bar{\alpha}_t$  for the  $T = 4000$  schedule.

When computing FID we produce 50K samples from our models, except for unconditional ImageNet  $64 \times 64$  where we produce 10K samples. Using only 10K samples biases the FID to be higher, but requires much less compute for sampling and helps do large ablations. Since we mainly use FID for relative comparisons on unconditional ImageNet  $64 \times 64$ , this bias is acceptable. For computing the reference distribution statistics we follow prior work (Ho et al., 2020; Brock et al., 2018) and use the full training set for CIFAR-10 and ImageNet, and 50K training samples for LSUN. Note that unconditional ImageNet  $64 \times 64$  models are trained and evaluated using the official ImageNet-64 dataset (van den Oord et al., 2016), whereas for class conditional ImageNet  $64 \times 64$  and  $256 \times 256$  we center crop and area downsample images (Brock et al., 2018).

In Table 1 we ablate the two major choices in our  $L_{\text{hybrid}}$  objective: the  $L_{\text{vib}}$  weight  $\lambda$ , and the stop-gradient after  $\mu_\theta$  when computing  $L_{\text{vib}}$ . We find that the stop-gradient improves sample quality and reduces sensitivity to  $\lambda$ .

## 2. Fast Sampling on LSUN $256 \times 256$

To test the effectiveness of our  $L_{\text{hybrid}}$  models on a high-resolution domain, we trained both  $L_{\text{hybrid}}$  and  $L_{\text{simple}}$  models on the LSUN bedroom (Yu et al., 2015) dataset. We

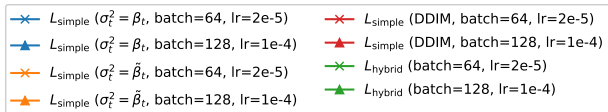

Figure 1. FID vs. number of sampling steps from an LSUN  $256 \times 256$  bedroom model.

| MODEL                                       | FID         |
|---------------------------------------------|-------------|
| VQ-VAE-2 ((Razavi et al., 2019), two-stage) | 38.1        |
| Improved Diffusion (ours, single-stage)     | 31.5        |
| Improved Diffusion (ours, two-stage)        | <b>12.3</b> |
| BigGAN (Brock et al., 2018)                 | 7.7         |
| BigGAN-deep (Brock et al., 2018)            | <b>7.0</b>  |

Table 2. Sample quality comparison on class conditional ImageNet  $256 \times 256$ . BigGAN FIDs are reported for the truncation that results in the best FID.

train two models: one with batch size 64 and learning rate  $2 \times 10^{-5}$  as in Ho et al. (2020), and another with a larger batch size 128 and learning rate  $10^{-4}$ . All models were trained with 153.6M examples, which is 2.4M training iterations with batch size 64.

Our results are displayed in Figure 1. We find that DDIM outperforms our  $L_{\text{hybrid}}$  model when using fewer than 50 diffusion steps, while our  $L_{\text{hybrid}}$  model outperforms DDIM with more than 50 diffusion steps. Interestingly, we note that DDIM benefits from a smaller learning rate and batch size, whereas our method is able to take advantage of a larger learning rate and batch size.

### 3. Sample Quality on ImageNet $256 \times 256$

We trained two models on class conditional ImageNet  $256 \times 256$ . The first is a usual diffusion model that directly models the  $256 \times 256$  images. The second model reduces compute by chaining a pretrained  $64 \times 64$  model  $p(x_{64}|y)$  with another upsampling diffusion model  $p(x_{256}|x_{64}, y)$  to upsample images to  $256 \times 256$ . For the upsampling model, the downsampled image  $x_{64}$  is passed as extra conditioning

input to the UNet. This is similar to VQ-VAE-2 (Razavi et al., 2019), which uses two stages of priors at different latent resolutions to more efficiently learn global and local features. The linear schedule worked better for  $256 \times 256$  images, so we used that for these results. Table 2 summarizes our results. For VQ-VAE-2, we use the FIDs reported in (Ravuri & Vinyals, 2019). Diffusion models still obtain the best FIDs for a likelihood-based model, and close the gap to GANs considerably.

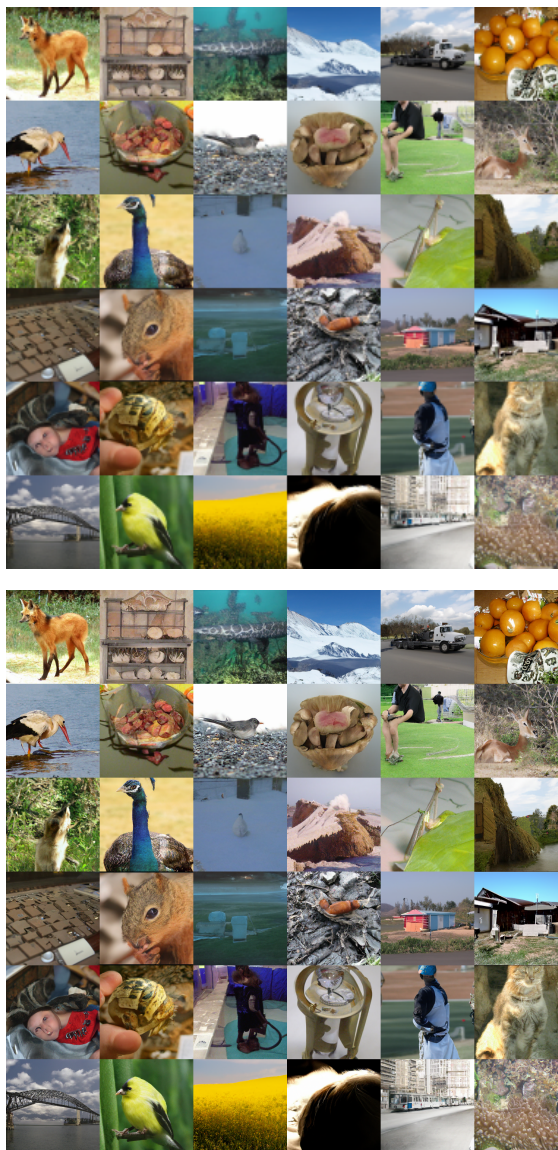

Figure 2. Random samples from two-stage class conditional ImageNet  $256 \times 256$  model. On top are random samples from the  $64 \times 64$  model (FID 2.92), whereas on bottom are the results after upsampling them to  $256 \times 256$  (FID 12.3). Each model uses 250 sampling steps.

#### 4. Combining $L_{\text{hybrid}}$ and $L_{\text{vib}}$ Models

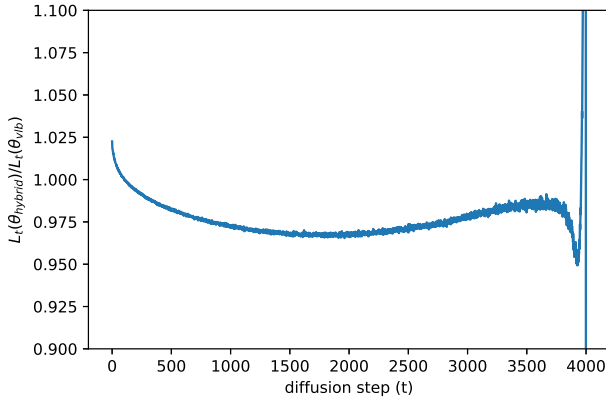

Figure 3. The ratio between VLB terms for each diffusion step of  $\theta_{\text{hybrid}}$  and  $\theta_{\text{vib}}$ . Values less than 1.0 indicate that  $\theta_{\text{hybrid}}$  is "better" than  $\theta_{\text{vib}}$  for that timestep of the diffusion process.

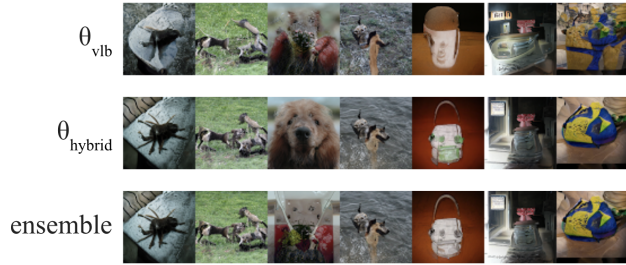

Figure 4. Samples from  $\theta_{\text{vib}}$  and  $\theta_{\text{hybrid}}$ , as well as an ensemble produced by using  $\theta_{\text{vib}}$  for the first and last 100 diffusion steps. For these samples, the seed was fixed, allowing a direct comparison between models.

To understand the trade-off between  $L_{\text{hybrid}}$  and  $L_{\text{vib}}$ , we show in Figure 3 that the model resulting from  $L_{\text{vib}}$  (referred to as  $\theta_{\text{vib}}$ ) is better at the start and end of the diffusion process, while the model resulting from  $L_{\text{hybrid}}$  (referred to as  $\theta_{\text{hybrid}}$ ) is better throughout the middle of the diffusion process. This suggests that  $\theta_{\text{vib}}$  is focusing more on imperceptible details, hence the lower sample quality.

Given the above observation, we performed an experiment on ImageNet  $64 \times 64$  to combine the two models by constructing an ensemble that uses  $\theta_{\text{hybrid}}$  for  $t \in [100, T - 100]$  and  $\theta_{\text{vib}}$  elsewhere. We found that this model achieved an FID of **19.9** and an NLL of **3.52 bits/dim**. This is only slightly worse than  $\theta_{\text{hybrid}}$  in terms of FID, while being better than both models in terms of NLL.

#### 5. Log-likelihood with Fewer Diffusion Steps

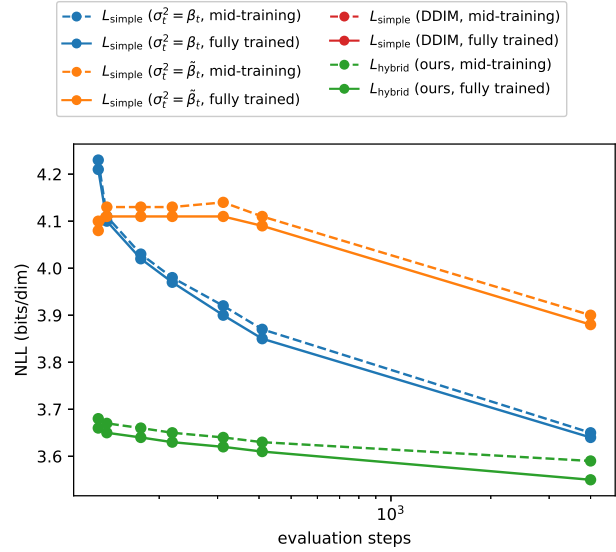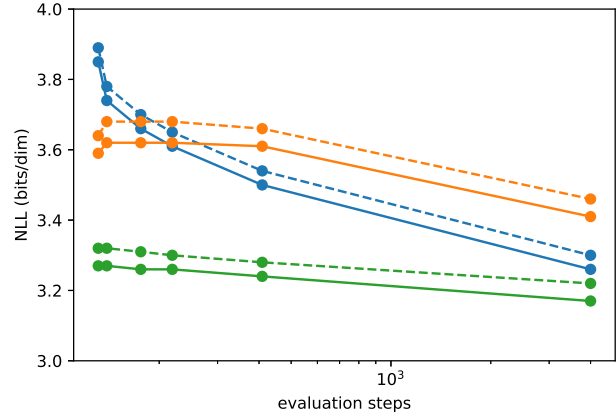

Figure 5. NLL versus number of evaluation steps, for models trained on ImageNet  $64 \times 64$  (top) and CIFAR-10 (bottom). All models were trained with 4000 diffusion steps.

Figures 5 plots negative log-likelihood as a function of number of sampling steps for both ImageNet  $64 \times 64$  and CIFAR-10. In initial experiments, we found that although constant striding did not significantly affect FID, it drastically reduced log-likelihood. To address this, we use a strided subset of timesteps as for FID, but we also include every  $t$  from 1 to  $T/K$ . This requires  $T/K$  extra evaluation steps, but greatly improves log-likelihood compared to the uniformly strided schedule. We did not attempt to calculate NLL using DDIM, since Song et al. (2020) does not present NLL results or a simple way of estimating likelihood under DDIM.



## 6. Overfitting on CIFAR-10

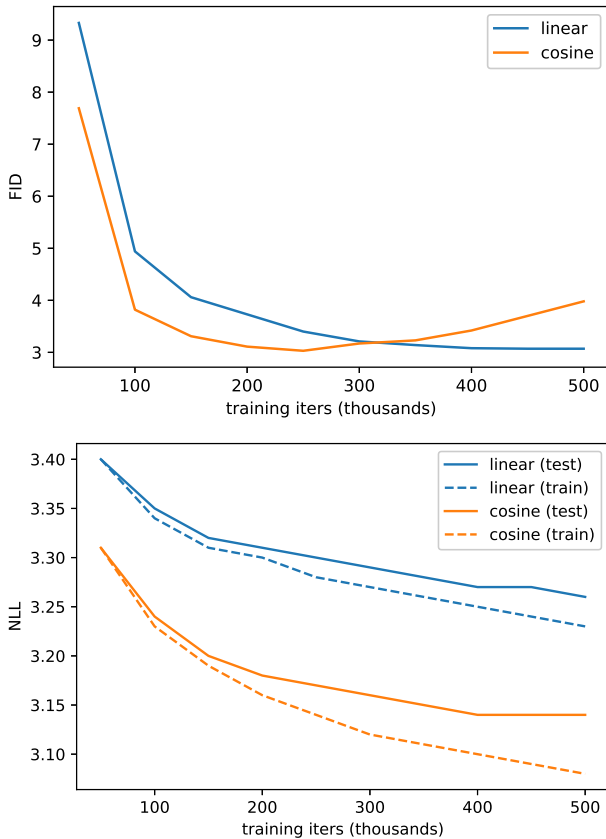

Figure 6. FID (top) and NLL (bottom) over the course of training for two CIFAR-10 models, both with dropout 0.1. The model trained with the linear schedule learns more slowly, but does not overfit as quickly. When too much overfitting occurs, we observed overfitting artifacts similar to those from Salimans et al. (2017), which is reflected by increasing FID.

All of our CIFAR-10 models experienced overfitting. This tended to hurt FID rather than producing exact training images, similar to observations from Salimans et al. (2017) and Ho et al. (2020). Before overfitting, all of our models tended to reach similar optimal FID at some point during training. Holding dropout constant, we found that models trained with our cosine schedule tended to reach optimal performance (and then overfit) more quickly than those trained with the linear schedule (Figure 6). In our experiments, we corrected for this difference by using more dropout for our cosine models than the linear models. We suspect that the overfitting from the cosine schedule is either due to 1) less noise in the cosine schedule providing less regularization, or 2) the cosine schedule making optimization, and thus overfitting, easier.

## 7. Early stopping for FID

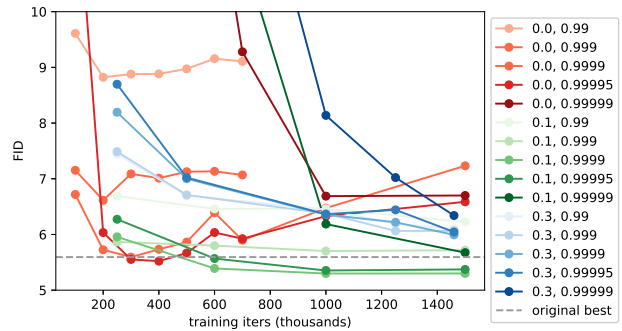

Figure 7. A sweep of dropout and EMA hyperparameters on class conditional ImageNet-64.

Like on CIFAR-10, we surprisingly observed overfitting on class-conditional ImageNet  $64 \times 64$ , despite it being a much larger and more diverse dataset. The main observable result of this overfitting was that FID started becoming worse over the course of training. We initially tried a sweep (Figure 7) over the EMA hyperparameter to make sure it was well tuned, and found that 0.9999 and 0.99995 worked best. We then tried runs with dropout 0.1 and 0.3, and found that models with a small amount of dropout improved the best attainable FID but took longer to get to the same performance and still eventually overfit. We concluded that the best way to train, given what we know, is to early stop and instead increase model size if we want to use additional training compute.

## 8. Samples with Varying Steps and Objectives

Figures 8 through 13 show unconditional ImageNet  $64 \times 64$  samples as we reduce number of sampling steps for an  $L_{\text{hybrid}}$  model with  $4K$  diffusion steps trained for 1.5M training iterations.

Figures 14 through 19 show unconditional CIFAR-10 samples as we reduce number of sampling steps for an  $L_{\text{hybrid}}$  model with  $4K$  diffusion steps trained for 500K training iterations.

Figures 20 and 21 highlight the difference in sample quality between models trained with  $L_{\text{hybrid}}$  and  $L_{\text{v1b}}$ .



220  
221  
222  
223  
224  
225  
226  
227  
228  
229  
230  
231  
232  
233  
234  
235  
236  
237  
238  
239  
240  
241  
242  
243  
244  
245  
246  
247  
248  
249  
250  
251  
252  
253  
254  
255  
256  
257  
258  
259  
260  
261  
262  
263  
264  
265  
266  
267  
268  
269  
270  
271  
272  
273  
274

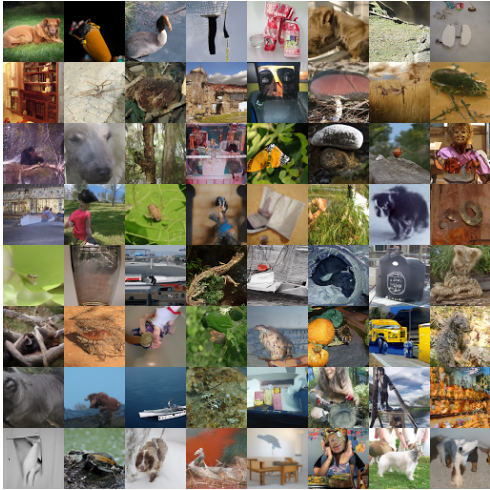

Figure 8. 50 sampling steps on unconditional ImageNet  $64 \times 64$

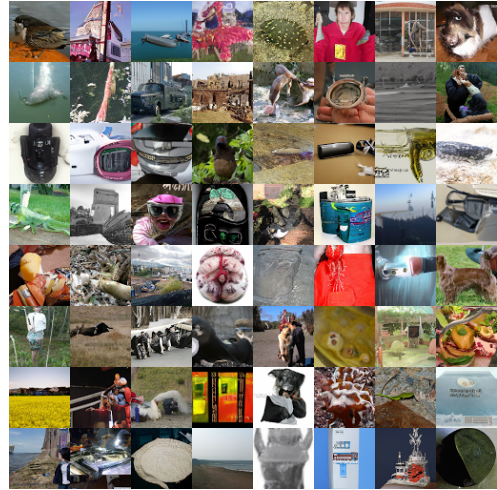

Figure 11. 400 sampling steps on unconditional ImageNet  $64 \times 64$

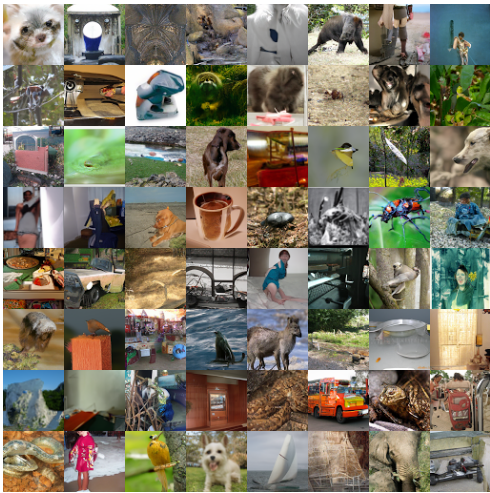

Figure 9. 100 sampling steps on unconditional ImageNet  $64 \times 64$

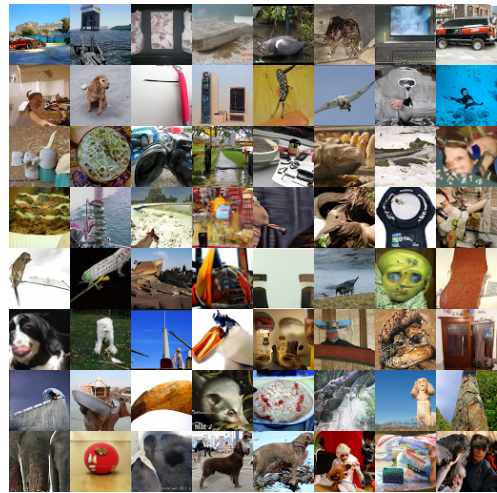

Figure 12. 1000 sampling steps on unconditional ImageNet  $64 \times 64$

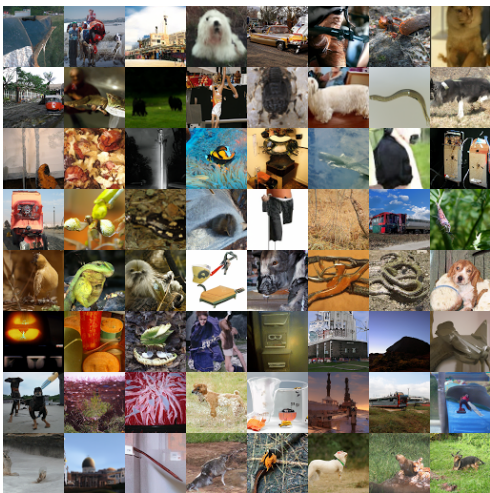

Figure 10. 200 sampling steps on unconditional ImageNet  $64 \times 64$

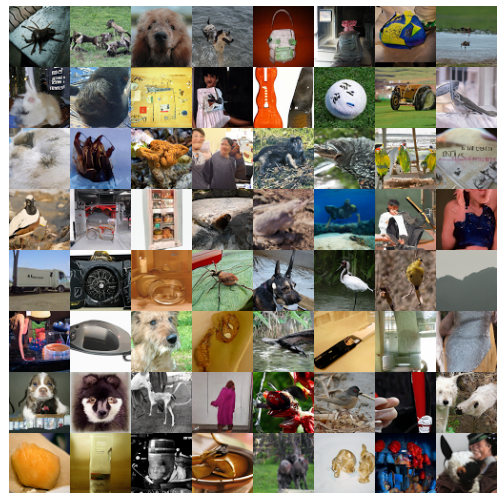

Figure 13. 4K sampling steps on unconditional ImageNet  $64 \times 64$ .



275  
276  
277  
278  
279  
280  
281  
282  
283  
284  
285  
286  
287  
288  
289  
290

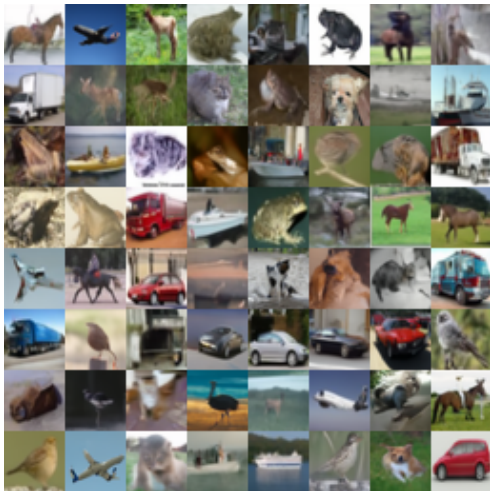

Figure 14. 50 sampling steps on unconditional CIFAR-10

291  
292  
293  
294  
295  
296  
297  
298  
299  
300  
301  
302  
303  
304  
305  
306  
307  
308  
309

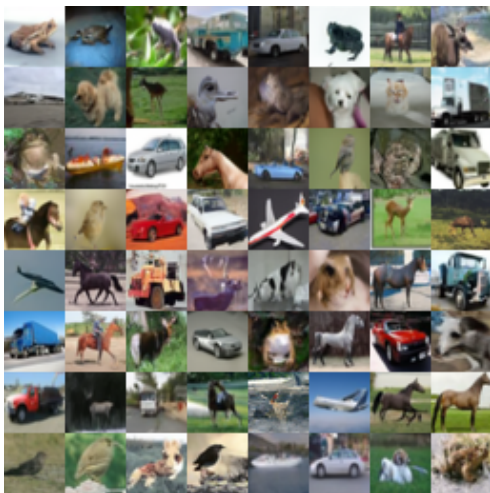

Figure 15. 100 sampling steps on unconditional CIFAR-10

310  
311  
312  
313  
314  
315  
316  
317  
318  
319  
320  
321  
322  
323  
324  
325  
326  
327  
328  
329

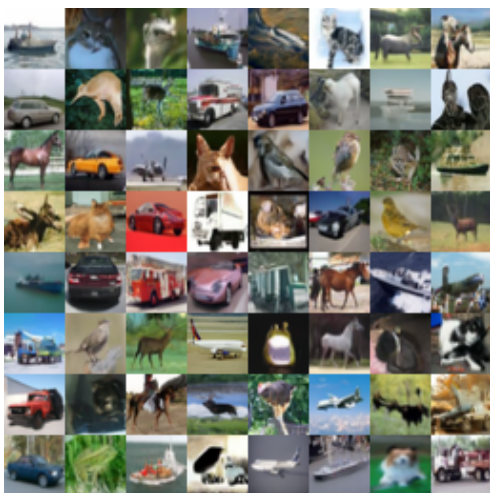

Figure 16. 200 sampling steps on unconditional CIFAR-10

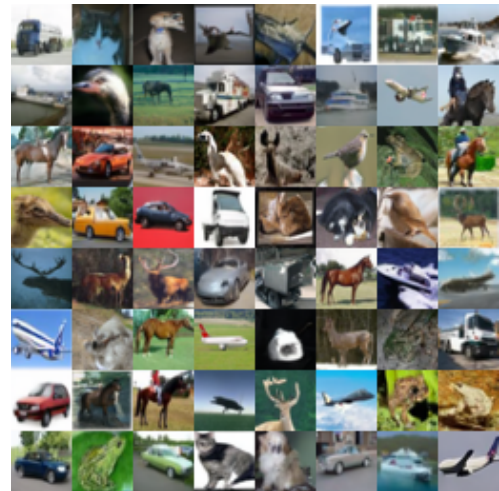

Figure 17. 400 sampling steps on unconditional CIFAR-10

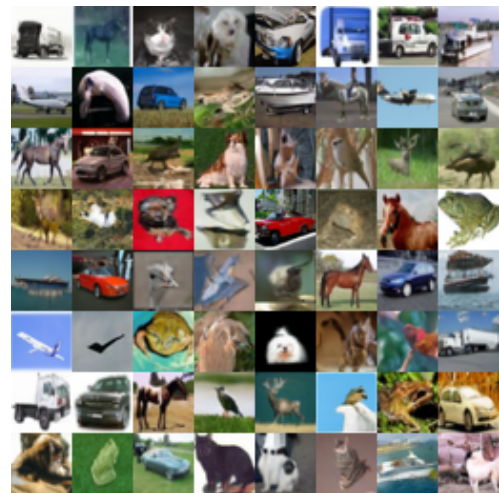

Figure 18. 1000 sampling steps on unconditional CIFAR-10

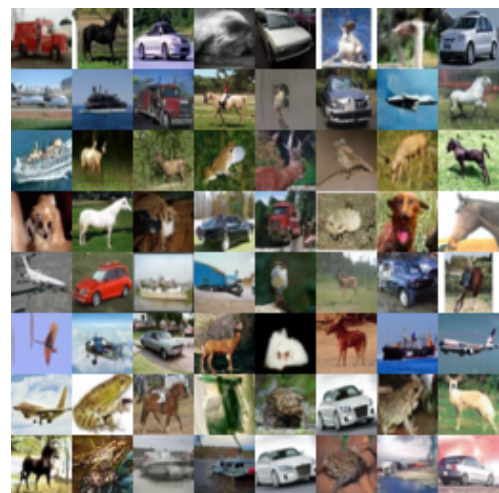

Figure 19. 4000 sampling steps on unconditional CIFAR-10

330  
 331  
 332  
 333  
 334  
 335  
 336  
 337  
 338  
 339  
 340  
 341  
 342  
 343  
 344  
 345  
 346  
 347  
 348  
 349  
 350  
 351  
 352  
 353  
 354  
 355  
 356  
 357  
 358  
 359  
 360  
 361  
 362  
 363  
 364  
 365  
 366  
 367  
 368  
 369  
 370  
 371  
 372  
 373  
 374  
 375  
 376  
 377  
 378  
 379  
 380  
 381  
 382  
 383  
 384

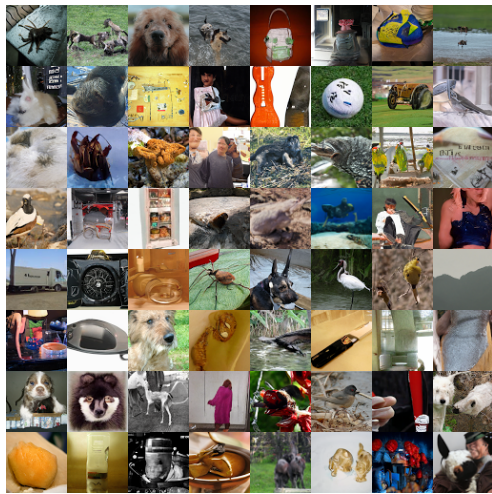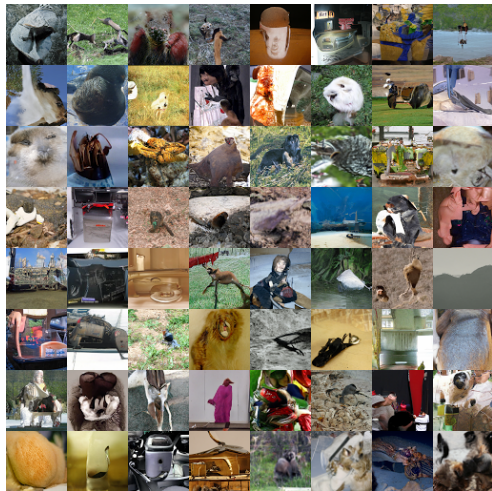

Figure 20. Unconditional ImageNet  $64 \times 64$  samples generated from  $L_{\text{hybrid}}$  (top) and  $L_{\text{vlb}}$  (bottom) models using the exact same random noise. Both models were trained for 1.5M iterations.

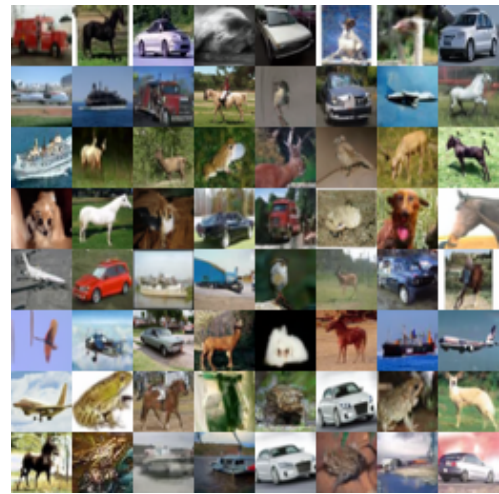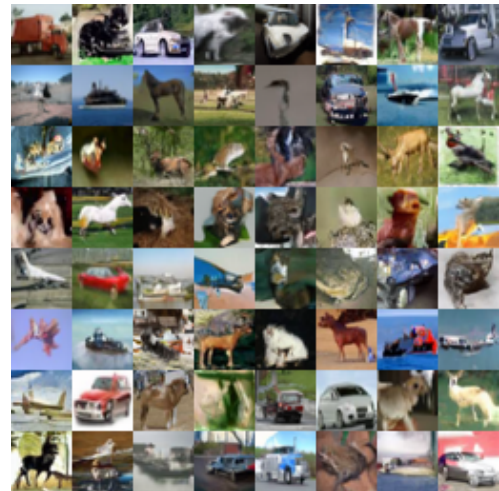

Figure 21. Unconditional CIFAR-10 samples generated from  $L_{\text{hybrid}}$  (top) and  $L_{\text{vlb}}$  (bottom) models using the exact same random noise. Both models were trained for 500K iterations.



**References**

- 385  
386 Brock, A., Donahue, J., and Simonyan, K. Large scale gan  
387 training for high fidelity natural image synthesis. *arXiv*  
388 *preprint arXiv:1809.11096*, 2018.  
389
- 390 He, K., Zhang, X., Ren, S., and Sun, J. Deep residual  
391 learning for image recognition, 2015.  
392
- 393 Ho, J., Jain, A., and Abbeel, P. Denoising diffusion proba-  
394 bilistic models, 2020.  
395
- 396 Kingma, D. P. and Ba, J. Adam: A method for stochastic  
397 optimization, 2014.
- 398 Ravuri, S. and Vinyals, O. Classification accuracy score  
399 for conditional generative models. *arXiv preprint*  
400 *arXiv:1905.10887*, 2019.  
401
- 402 Razavi, A., van den Oord, A., and Vinyals, O. Generating  
403 diverse high-fidelity images with vq-vae-2, 2019.  
404
- 405 Salimans, T., Karpathy, A., Chen, X., and Kingma, D. P. Pix-  
406 elcnn++: Improving the pixelcnn with discretized logistic  
407 mixture likelihood and other modifications, 2017.
- 408 Song, J., Meng, C., and Ermon, S. Denoising diffusion  
409 implicit models, 2020.  
410
- 411 van den Oord, A., Kalchbrenner, N., and Kavukcuoglu, K.  
412 Pixel recurrent neural networks, 2016.  
413
- 414 Vaswani, A., Shazeer, N., Parmar, N., Uszkoreit, J., Jones,  
415 L., Gomez, A. N., Kaiser, L., and Polosukhin, I. Attention  
416 is all you need, 2017.
- 417 Yu, F., Seff, A., Zhang, Y., Song, S., Funkhouser, T., and  
418 Xiao, J. Lsun: Construction of a large-scale image dataset  
419 using deep learning with humans in the loop, 2015.  
420  
421  
422  
423  
424  
425  
426  
427  
428  
429  
430  
431  
432  
433  
434  
435  
436  
437  
438  
439
